# Supplementary material for: Soil carbon, nitrogen and phosphorus ecological stoichiometry shifts with tree species in subalpine plantations
Source: PeerJ. 2020 Oct 12;8:e9702. doi: 10.7717/peerj.9702 (PMC7560321; doi:10.7717/peerj.9702)
Supplement: Supplemental Information 1 — 1. Basic data; 2. related data of C:N:P [file peerj-08-9702-s001.xlsx]

## Sheet: basic information
Plantation	AL- biomass (t. ha -1)	U-biomass (t. ha -1)	L-stock (t. ha -1)	TA-biomass (t. ha -1)	AL:TA	U:TA	L-C	L-N	L-P	L- C:N	L-N:P	L- C:P	Richness index	Margalef index	SW index	Simpson index	Pielou index
LAR	108.14	0.39	8.11	116.64	0.93	0.0033	391.4	14.72	0.874751	31.0213	37.2612	1155.89	8	1.91071	1.80452	0.18	0.867791
LAR	101.54	0.38	9.14	111.05	0.91	0.0034	396.4	17.89	0.752982	25.8506	52.6089	1359.97	11	2.64257	2.04244	0.19	0.851762
LAR	65.2	0.1	7.8	73.1	0.89	0.0014	454.5	18.43	0.921968	28.771	44.2632	1273.5	8	2.002	1.82563	0.17	0.877941
PT	174.91	0.22	7.73	182.86	0.96	0.0012	415	12.13	0.857286	39.9148	31.3306	1250.56	7	1.55838	1.362	0.622	0.69993
PT	211.52	0.33	8.48	220.33	0.96	0.0015	422.7	12.7	0.777061	38.8307	36.1895	1405.26	4	0.779191	0.688198	0.39	0.49643
PT	85.05	0.22	6.94	92.21	0.92	0.0024	395.9	11.91	0.730731	38.7811	36.0901	1399.61	9	1.95391	1.85831	0.157	0.845753
CJ	199.16	0.12	4.24	203.52	0.98	0.0006	446	11.76	0.975186	44.246	26.7026	1181.48	3	0.582413	0.379535	0.78	0.345468
CJ	226.52	0.54	3.94	230.99	0.98	0.0023	467.25	14.04	0.902087	38.8266	34.4629	1338.08	6	1.36479	0.955112	0.97	0.533058
CJ	206.27	0.08	3.64	210	0.98	0.0004	488.5	15.83	0.785237	36.0023	44.639	1607.11	2	0.286	0.135794	0.59	0.195909
S	30.14	13.3	2.96	46.39	0.65	0.2866	432.3	12.98	0.769038	38.8559	37.3732	1452.17	15	2.72285	2.15051	0.14	0.794118
S	24.51	9.55	3.01	37.06	0.66	0.2575	422.6	15.16	0.670281	32.522	50.0813	1628.74	17	3.34204	2.38401	0.16	0.841452
S	33.13	9.22	5.64	47.99	0.69	0.1921	441.8	15.82	0.843074	32.5811	41.5503	1353.76	14	2.57761	2.13144	0.12	0.807653

## Sheet: CNP
ID	Depth	2018year	Bulk density (g/cm3)	Fine root biomass (t.ha-1)	Moisture(%)	SOC(g/kg)	TN(g/kg)	P(g/kg)	C:N	N:P	C:P	2007year	SOC(g/kg)	TN(g/kg)	P(g/kg)	C:N	N:P	C:P
LAR-H-1	0-10		0.95551	0.41529	52.3585	46.2	2.76	0.323298	19.529	18.9034	369.164		79.42	3.70611	0.394276	25.0011	20.8138	520.368
LAR-H-2	0-10		0.678934	0.54268	39.115	50.8	2.71	0.2811	21.8696	21.3472	466.856		83.77	3.9367	0.43983	24.8258	19.819	492.022
LAR-H-3	0-10		0.781163	0.44841	46.1538	50.5	2.86	0.3338	20.6002	18.972	390.828		83.37	5.11852	0.540648	19.0026	20.9635	398.36
PT-H-1	0-10		1.35667	0.45605	31.7782	31.4	1.78	0.227772	20.5805	17.3042	356.131		37.83	2.00236	0.359157	22.0415	12.345	272.103
PT-H-2	0-10		1.20138	0.54268	25.4973	29.1	1.77	0.232139	19.1808	16.8833	323.836		38.43	1.81595	0.237751	24.6895	16.9128	417.569
PT-H-3	0-10		0.8962	0.49809	37.2577	34.9	2.13	0.248608	19.1158	18.9714	362.653		30.89	1.54628	0.201675	23.3065	16.9773	395.681
LX-1	0-10		0.85295	0.89682	39.9731	41.2	3.01	0.54206	15.969	12.2957	196.35		65.93	3.40626	0.478736	22.5814	15.7549	355.768
LX-2	0-10		0.86379	0.98522	38.9234	39.8	3.02	0.440476	15.3753	15.1816	233.422		28.42	1.97078	0.418078	16.8241	10.4379	175.609
LX-3	0-10		0.98268	1.07363	36.9119	42.5	3.25	0.486334	15.2564	14.7973	225.753		52.73	2.75713	0.431746	22.3125	14.1404	315.507
S1	0-10		0.94938	1.62981	49.5192	42.6	2.87	0.235129	17.3171	27.0278	468.042		99.34	5.46551	0.463576	21.2051	26.1062	553.584
S2	0-10		0.76376	0.84561	53.2286	41.9	3.36	0.254815	14.5486	29.1976	424.785		77.77	3.46666	0.299219	26.1727	25.654	671.434
S3	0-10		1.06292	0.87873	37.4825	45.3	3.63	0.29228	14.5592	27.5006	400.387		123.7	6.86214	0.469061	21.0309	32.3939	681.272
LAR-H-1	10-20		1.43305	0.07389	17.8119	14.3	1.38	0.23103	12.0894	13.2265	159.9		17	1.12567	0.322071	17.6192	7.73911	136.357
LAR-H-2	10-20		1.31387	0.06803	27.4705	14.8	1.42	0.224854	12.1596	13.9837	170.036		33.91	2.55144	0.333047	15.5056	16.9635	263.029
LAR-H-3	10-20		1.37351	0.09758	25.4376	15.3	1.39	0.256819	12.8417	11.9846	153.902		45.01	3.04037	0.439977	17.2715	15.3013	264.277
PT-H-1	10-20		1.63594	0.14522	14.3072	15.8	1.35	0.249302	13.6543	11.9906	163.724		28.37	1.6101	0.287602	20.5568	12.3964	254.829
PT-H-2	10-20		1.53594	0.09631	20.8449	19.3	1.63	0.227995	13.8139	14.5566	218.681		24.1	1.25504	0.205742	22.4031	13.5073	302.604
PT-H-3	10-20		1.2644	0.16459	27.0482	14	1.19	0.20713	13.7255	12.7215	174.608		27.59	1.33424	0.203849	24.1249	14.493	349.642
LX-1	10-20		1.33498	0.19873	27.1028	24.9	2.37	0.48123	12.2574	10.9051	133.668		72.11	3.61067	0.477537	23.2999	16.7423	390.094
LX-2	10-20		0.86568	0.28662	39.4511	34.2	3.14	0.419932	12.707	16.5571	210.391		32.82	2.05414	0.407438	18.6404	11.1635	208.093
LX-3	10-20		0.97705	0.37452	36.1342	28.9	2.79	0.433307	12.0848	14.2575	172.299		24.91	1.44278	0.345688	20.1428	9.24164	186.153
S1	10-20		1.39635	0.26497	24.5107	14.1	1.24	0.16547	13.2661	16.5934	220.13		32.26	2.1612	0.242925	17.4147	19.6996	343.061
S2	10-20		1.03546	0.23949	40.5367	12.7	1.15	0.177503	12.8841	14.3458	184.833		31.33	1.85218	0.20725	19.7344	19.7889	390.523
S3	10-20		1.27806	0.15032	21.9013	15.8	1.35	0.209038	13.6543	14.3002	195.259		48.92	3.0215	0.389309	18.8891	17.1855	324.618
LAR-H-1	20-30		1.45633	0.02803	17.3771	9.7	1.1	0.206929	10.2879	11.363	121.096		12.69	0.959946	0.251063	15.4227	8.46638	130.575
LAR-H-2	20-30		1.63134	0.1172	22.9114	13.8	1.28	0.23155	12.5781	11.4108	153.962		12.38	0.864683	0.220605	16.7036	8.6791	144.972
LAR-H-3	20-30		1.80647	0.07312	13.3866	14.4	1.39	0.254039	12.0863	11.7504	146.434		23.54	2.01339	0.342079	13.6403	13.0327	177.771
PT-H-1	20-30		1.63293	0.06879	22.7242	11.8	1.18	0.239712	11.6667	10.9	127.166		20.19	1.27639	0.301977	18.4544	9.35928	172.72
PT-H-2	20-30		1.47475	0.10701	19.722	13.6	1.3	0.261982	12.2051	10.6305	134.106		11.85	0.915027	0.233106	15.1088	8.69188	131.324
PT-H-3	20-30		1.46924	0.0986	23.1318	15.7	1.34	0.226862	13.6692	13.0791	178.78		7.39	0.553667	0.164236	15.5719	7.46473	116.24
LX-1	20-30		1.56142	0.20637	16.5347	26	1.58	0.432779	19.1983	8.08397	155.199		7.62	0.680835	0.148209	13.0575	10.1719	132.819
LX-2	20-30		1.03781	0.59551	32.9527	23	2.34	0.383149	11.4672	13.5233	155.074		24.61	1.56385	0.281043	18.3596	12.3213	226.214
LX-3	20-30		1.13728	0.14013	32.9226	27.4	1.95	0.404101	16.3932	10.6851	175.162		12.72	3.38977	0.332127	4.37788	22.5995	98.938
S1	20-30		1.58659	0.13452	22.8045	19.3	1.09	0.171281	20.6575	14.0913	291.091		13.46	1.24998	0.209163	12.5629	13.2328	166.242
S2	20-30		1.48837	0.21885	24.5184	16.2	1.01	0.165801	18.7129	13.4886	252.411		28.85	1.52356	0.202897	22.0919	16.6271	367.325
S3	20-30		1.28173	0.20382	21.0678	18.1	1.49	0.182658	14.1723	18.0627	255.989		31.95	2.29245	0.360271	16.2599	14.0898	229.098
